# Supplementary material for: Colony-stimulating factor 1 receptor blockade prevents fractionated whole-brain irradiation-induced memory deficits
Source: J Neuroinflammation. 2016 Aug 30;13(1):215. doi: 10.1186/s12974-016-0671-y (PMC5006433; doi:10.1186/s12974-016-0671-y)
Supplement: Additional file 3: Table S1. — Dendritic spine quantification of granule neurons in dentate gyrus.(XLSX 14 kb) [file 12974_2016_671_MOESM3_ESM.xlsx]

## Sheet: Spine density absolute #
10 days
Animal #	Group	length dendrites (um)	# of dendritic spines	dendritic spine density (spines/10um)
1	Sham	10514.3	4207	4.00124
2	Sham	11834	4750	4.01387
3	Sham	7891.75	2704	3.42636
4	Sham	6293.07	2046	3.2512
5	Sham	7636.89	2272	2.97503
1	IRR	9433.03	3130	3.31813
2	IRR	7961.75	3004	3.77304
3	IRR	11895.5	4099	3.44585
4	IRR	5955.18	1650	2.7707
5	IRR	10477.5	2762	2.63613
1	Sham+PLX5622	10062.5	3623	3.60048
2	Sham+PLX5622	7561.18	2768	3.6608
3	Sham+PLX5622	9630.39	3545	3.68106
4	Sham+PLX5622	4837.5	1580	3.26615
5	Sham+PLX5622	11988	4710	3.92893
1	IRR+PLX5622	10869.3	3829	3.52276
2	IRR+PLX5622	7493.93	2610	3.48282
3	IRR+PLX5622	9973.93	3517	3.52619
4	IRR+PLX5622	10575	3646	3.44776
5	IRR+PLX5622	7341.14	2179	2.9682
33 days
Animal #	Group	length dendrites (um)	# of dendritic spines	dendritic spine density (spines/10um)
1	Sham	7879.23	2646	3.3582
2	Sham	9934.21	2880	2.89907
3	Sham	9763.2	3463	3.54699
4	Sham	6103.49	2138	3.50291
5	Sham	9242.98	3224	3.48805
1	IRR	3276	810	2.47253
2	IRR	8044.88	2361	2.93479
3	IRR	8240.1	2051	2.48905
4	IRR	5697.98	1644	2.88523
5	IRR	8145.55	2119	2.60142
1	Sham+PLX5622	4235.97	1471	3.47264
2	Sham+PLX5622	5450.4	1934	3.54837
3	Sham+PLX5622	9077.55	2740	3.01844
4	Sham+PLX5622	7291.61	2385	3.27088
5	Sham+PLX5622	4165.51	1201	2.8832
6	Sham+PLX5622	3979.5	1174	2.95012
1	IRR+PLX5622	8281.26	2828	3.41494
2	IRR+PLX5622	7560.4	2987	3.95085
3	IRR+PLX5622	5821.86	2186	3.75482
4	IRR+PLX5622	6630.41	2393	3.60913
5	IRR+PLX5622	7346.56	2625	3.5731
6	IRR+PLX5622	5393.2	1902	3.52666
